# Supplementary material for: Global freshwater distribution of Telonemia protists
Source: PubMed Central journal article supplement (PMC11512789; doi:10.1093/ismejo/wrae177), 2024-09-20
Supplement: supplementary_figure_s5_wrae177.pdf [file supplementary_figure_s5_wrae177.pdf]

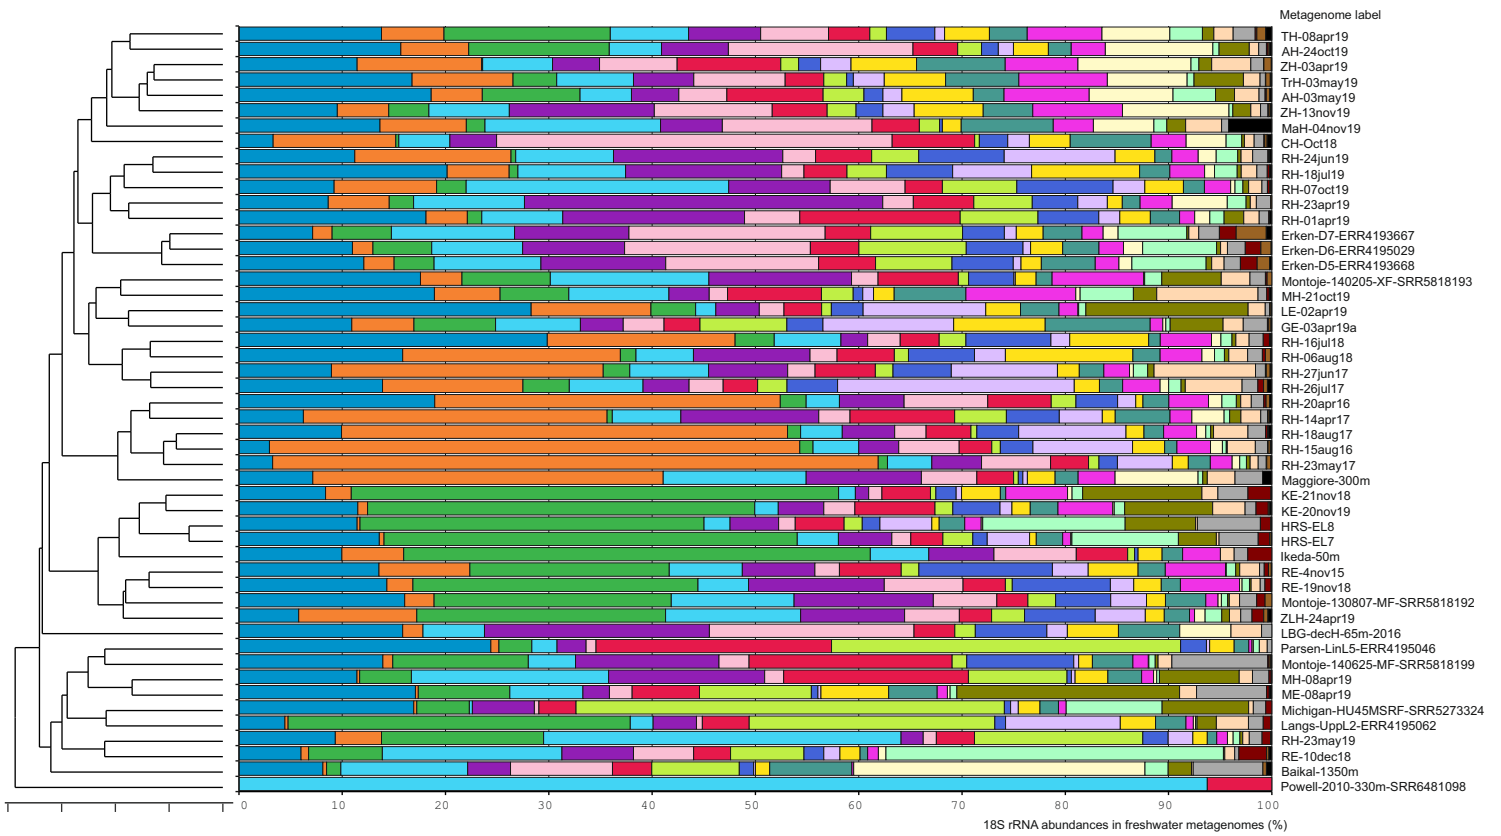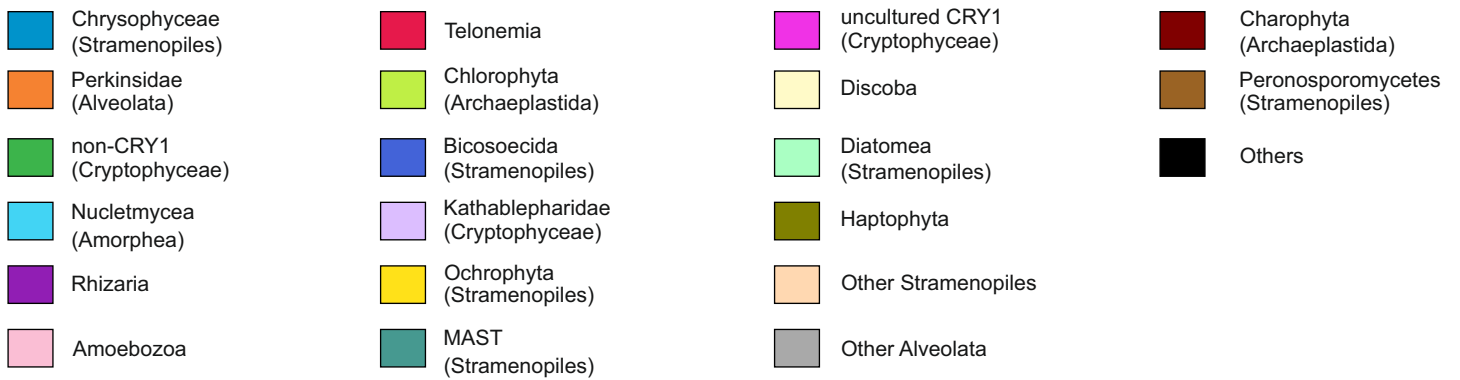

**Supplementary Figure S5.** Clustering of eukaryal 18S rRNA abundances in freshwater metagenomes. Only those metagenomes with percentage of *Telonemia* >1% are shown. Datasets are clustered using Bray-Curtis metric and the tree is shown to the left. Sample names are shown to the right. Colors for all top categories are shown below.
