# Supplementary material for: Global freshwater distribution of Telonemia protists
Source: PubMed Central journal article supplement (PMC11512789; doi:10.1093/ismejo/wrae177), 2024-09-20
Supplement: supplementary_figure_s6_wrae177.pdf [file supplementary_figure_s6_wrae177.pdf]

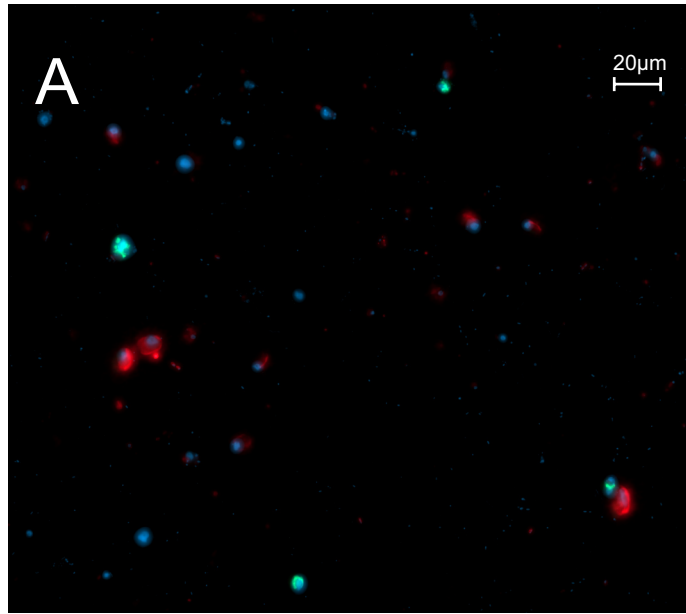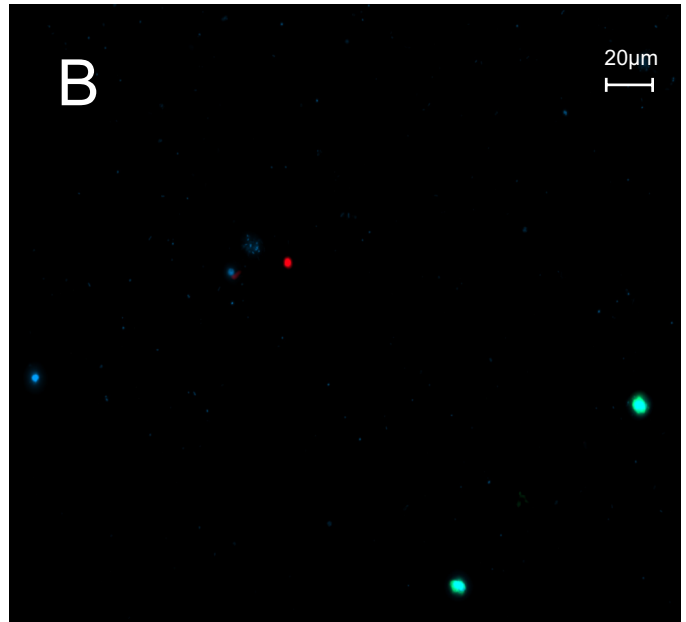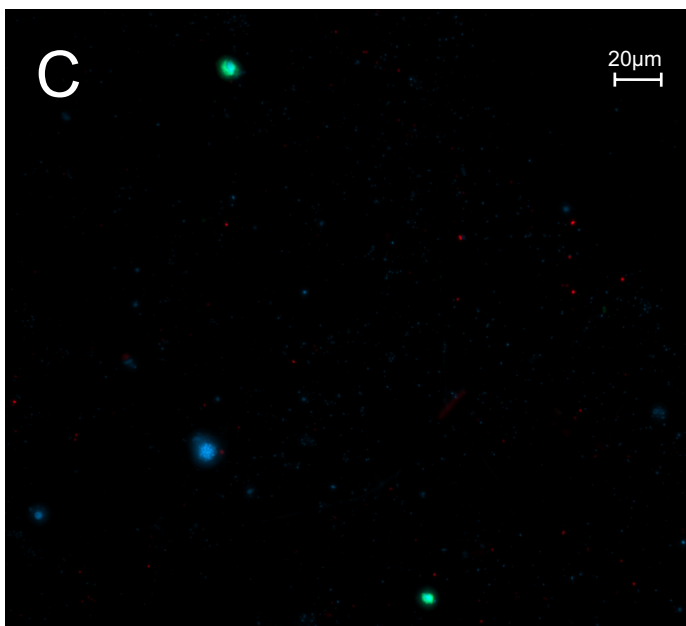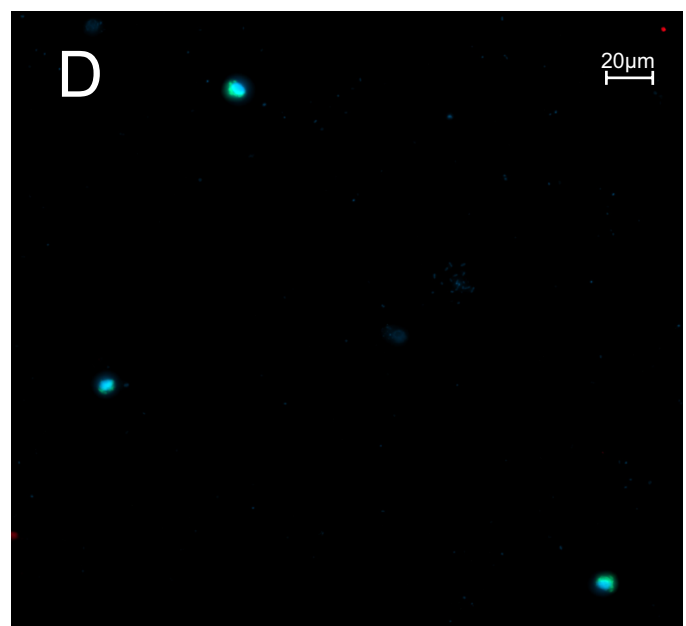

**Supplementary Figure S6.** CARD-FISH images of *Telonemia* targeted by the probe Telo-1250 (magnification 40X). Green: CARD-FISH probe, blue: DAPI, red: autofluorescence. (A) from Lake Stechlin (40 m), (B) from Lake Breiter Luzin (50 m), (C) and (D) Lake Cinciş (20 m). All scale bars are 20 µm.
