# Supplementary material for: Global freshwater distribution of Telonemia protists
Source: PubMed Central journal article supplement (PMC11512789; doi:10.1093/ismejo/wrae177), 2024-09-20
Supplement: supplementary_figure_s7_wrae177.pdf [file supplementary_figure_s7_wrae177.pdf]

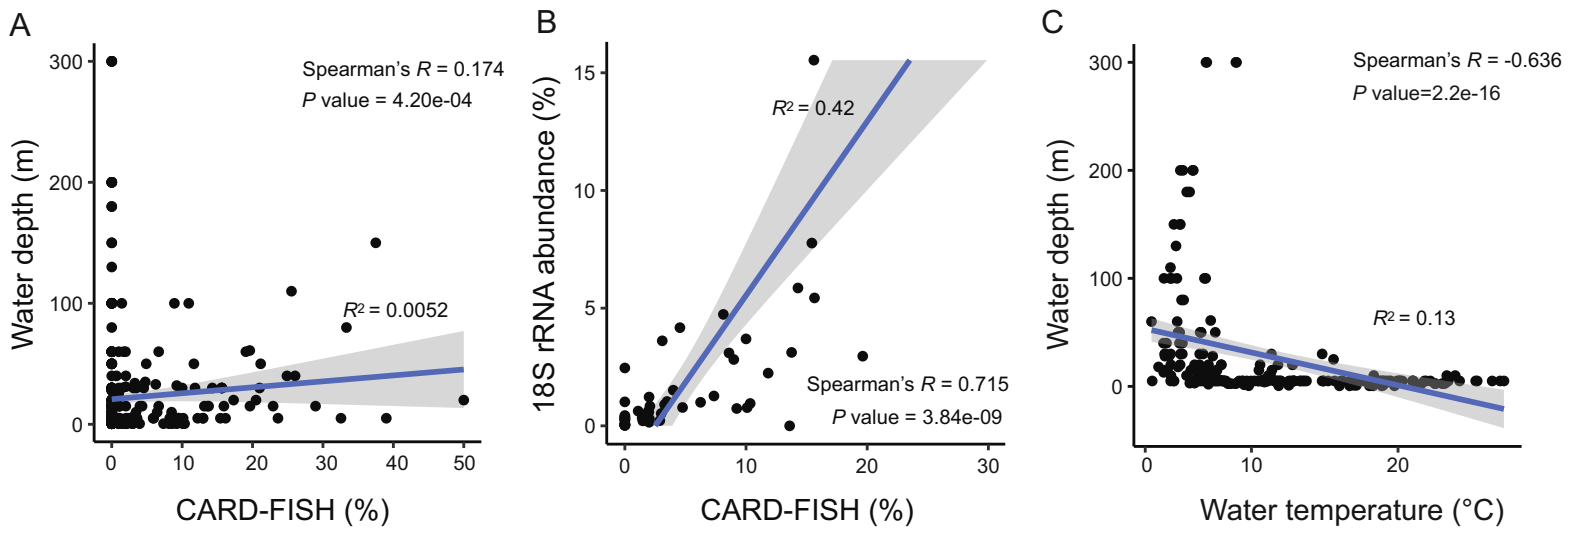

**Supplementary Figure S7.** Linear regression analysis between (A) CARD-FISH percentage of *Telonemia* and water depth. (B) CARD-FISH percentages of *Telonemia* and *Telonemia* 18S rRNA gene abundance, and (C) water depth and temperature. 95% confidence intervals are shown with the line of best-fit. Spearman's coefficient with  $P$  value are shown at top-right.
